# Supplementary material for: Thermally stable Pd/CeO2@SiO2 with a core–shell structure for catalytic lean methane combustion
Source: Royal Society of Chemistry journal article supplement (doi:10.1039/d3nr06620g), 2024-01-01
Supplement: d3nr06620g1.pdf [file d3nr06620g1.pdf]

# Supporting Information

## Thermally stable Pd/CeO<sub>2</sub>@SiO<sub>2</sub> with core-shell structure for catalytic lean methane combustion

Linyan Tan, Ganghua Xiang, Zhigang Liu \*

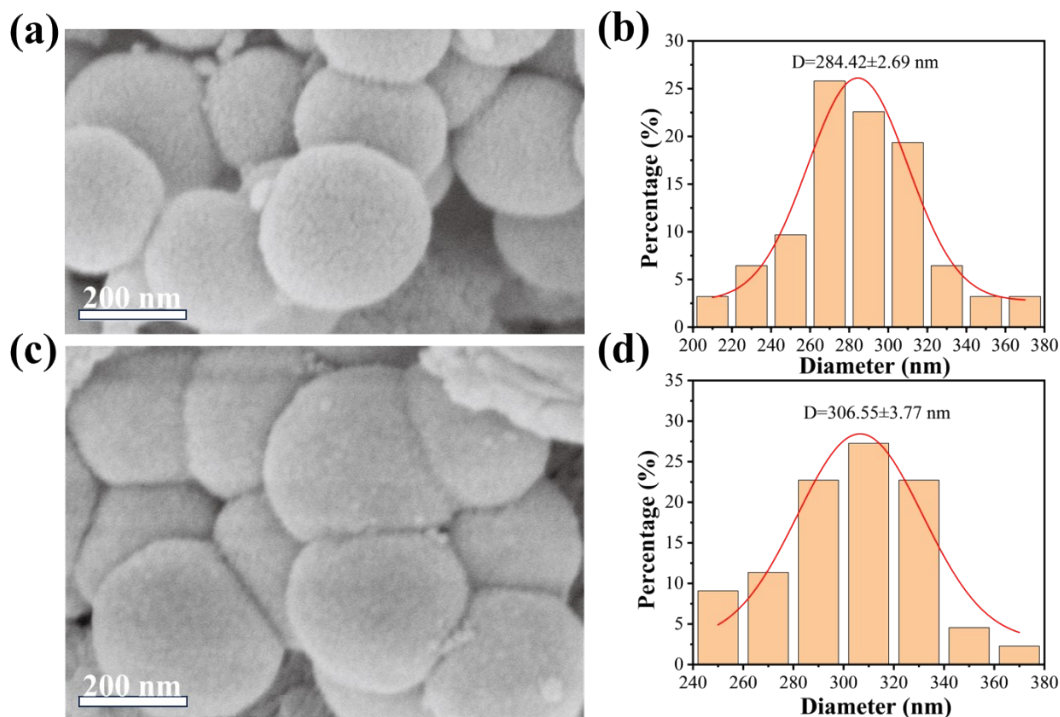

**Fig. S1.** (a) SEM images of Pd/CeO<sub>2</sub>, (b) the size distribution of Pd/CeO<sub>2</sub>, (c) SEM images of Pd/CeO<sub>2</sub>-spent, and (d) the size distribution of Pd/CeO<sub>2</sub>-spent.

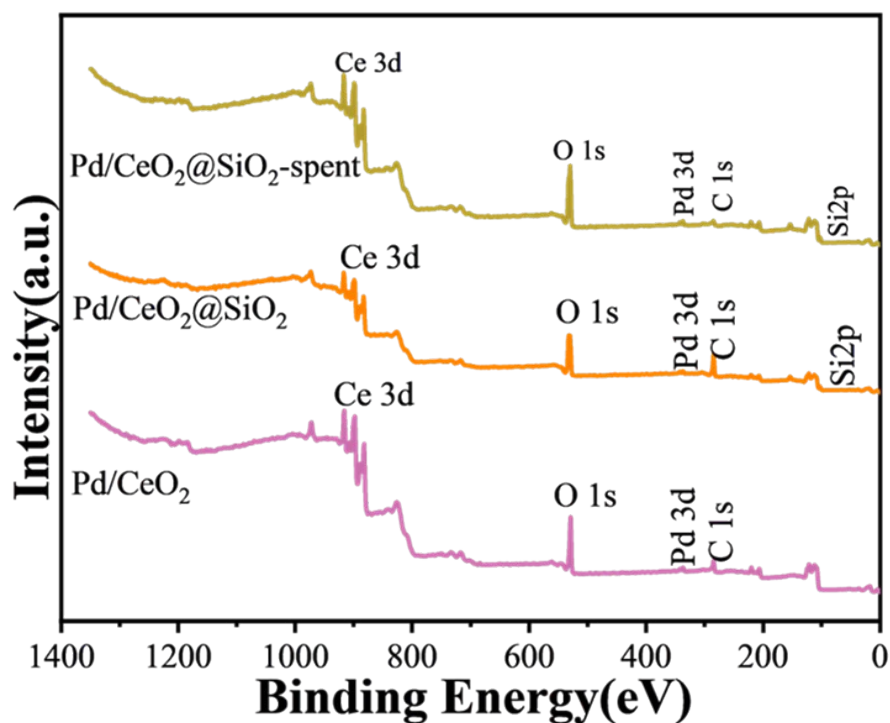

Fig. S2. The full spectrum of the as-prepared catalysts.

Table S1. Comparison of catalytic CH<sub>4</sub> combustion performance of Pd-based catalysts

| Catalysts                              | Pd (wt.%) | T <sub>90</sub> | Catalytic conditions                                                             | Space velocity (mL/g·h) | References |
|----------------------------------------|-----------|-----------------|----------------------------------------------------------------------------------|-------------------------|------------|
| Pd/CeO <sub>2</sub> @SiO <sub>2</sub>  | 0.99      | 405             | 1 vol% CH <sub>4</sub> ,<br>10 vol% O <sub>2</sub><br>in N <sub>2</sub> balance  | 30000                   | This work  |
| Pd/CO <sub>3</sub> O <sub>4</sub>      | 1         | 467             | 1 vol% CH <sub>4</sub> ,<br>O <sub>2</sub> (excess),<br>N <sub>2</sub> (balance) | 60000                   | S1         |
| PdO/CeO <sub>2</sub> @HZSM-5           | 0.93      | 535             | 0.5 vol% CH <sub>4</sub> ,<br>10 vol% O <sub>2</sub> /Ar                         | 30000                   | S2         |
| NiO@PdO/Al <sub>2</sub> O <sub>3</sub> | 0.2       | 368             | 1 vol% CH <sub>4</sub><br>balanced with<br>air                                   | 30000                   | S3         |

|                                                          |      |     |                                                                                                                    |        |     |
|----------------------------------------------------------|------|-----|--------------------------------------------------------------------------------------------------------------------|--------|-----|
| Pd/CeO <sub>2</sub>                                      | 1    | 445 | 1 vol% CH <sub>4</sub> ,<br>20 vol% O <sub>2</sub> ,<br>N <sub>2</sub> (balance)                                   | 16,000 | S4  |
| H-Pd@CeO <sub>2</sub> -600(24)                           | 1    | 465 | 2 vol% CH <sub>4</sub> ,<br>4 vol% O <sub>2</sub> ,<br>and 20 vol%<br>CO <sub>2</sub> in N <sub>2</sub><br>balance | 100000 | S5  |
| Pd/ $\kappa$ -CeZrO <sub>4</sub>                         | 0.95 | 345 | 1 vol.% CH <sub>4</sub> ,<br>20 vol.% O <sub>2</sub><br>and N <sub>2</sub> balance                                 | 30000  | S6  |
| Pd@S-1                                                   | 0.6  | 350 | 1 vol% CH <sub>4</sub> ,<br>16 vol% O <sub>2</sub> and<br>balanced with<br>N <sub>2</sub>                          | 50000  | S7  |
| Pd@H-ZSM-5                                               | 0.7  | 400 | 1% CH <sub>4</sub> and<br>5% O <sub>2</sub> (He as<br>balance)                                                     | 60000  | S8  |
| Pd(PdO)/Co <sub>3</sub> O <sub>4</sub> @SiO <sub>2</sub> | 1    | 445 | 1%CH <sub>4</sub> , 21%O <sub>2</sub><br>and balance N <sub>2</sub>                                                | 30 000 | S9  |
| Pd@CeO <sub>2</sub> -BDC                                 | 1    | 342 | 1 vol% CH <sub>4</sub> ,<br>balanced with<br>air                                                                   | 60000  | S10 |

## References

- 1 G. Ercolino, G. Grzybek, P. Stelmachowski, S. Specchia, A. Kotarba and V. Specchia, *Catal. Today*, 2015, **257**, 66–71.
- 2 Q. Dai, S. Bai, Y. Lou, X. Wang, Y. Guo and G. Lu, *Nanoscale*, 2016, **8**, 9621–9628.
- 3 X. Zou, Z. Rui and H. Ji, *ACS Catal.*, 2017, **7**, 1615–1625.
- 4 T. Guo, X. Nie, J. Du and J. Li, *RSC Adv.*, 2018, **8**, 38641–38647.
- 5 G. Cai, W. Luo, Y. Xiao, Y. Zheng, F. Zhong, Y. Zhan and L. Jiang, *ACS Omega*, 2018, **3**, 16769–16776.
- 6 Y. Ding, Q. Wu, B. Lin, Y. Guo, Y. Guo, Y. Wang, L. Wang and W. Zhan, *Appl. Catal. B Environ.*, 2020, **266**, 118631.
- 7 W. Wang, W. Zhou, W. Li, X. Xiong, Y. Wang, K. Cheng, J. Kang, Q. Zhang and Y. Wang, *Appl. Catal. B Environ.*, 2020, **276**, 119142.
- 8 M. Gao, Z. Gong, X. Weng, W. Shang, Y. Chai, W. Dai, G. Wu, N. Guan and L. Li, *Chin. J. Catal.*, 2021, **42**, 1689–1699.
- 9 Y. Ma, S. Li, T. Zhang, Y. Zhang, X. Wang, Y. Xiao, Y. Zhan and L. Jiang, *Nanoscale*, 2021, **13**, 5026–5032.

10 M. Wu, M. Miao, W. Li, X. Zhang, L. Zhang, T. Zhen, Y. Fu, J. Jin and L. Yuan, *Fuel*, 2023, **331**, 125575.
